# Supplementary material for: Straightforward detection of the secondary ionisation of the phosphate group and pK determinations by high-resolution solid-state 31P NMR
Source: Royal Society of Chemistry journal article supplement (doi:10.1039/b413415j), 2004-10-25
Supplement: b413415j.pdf [file b413415j.pdf]

## Supplementary Information

### Straightforward detection of the secondary ionization of the phosphate group and pK determinations by high-resolution solid-state $^{31}\text{P}$ NMR.

Carole Gardiennet<sup>†</sup>, Bernard Henry<sup>†</sup>, Paul Kuad<sup>‡</sup>, Bernard Spiess<sup>‡</sup> and Piotr Tekely<sup>\*†</sup>

*Contribution from the UMR CNRS 7565, Université Henri Poincaré, Nancy 1, 54506 Vandoeuvre-lès-Nancy, France, and UMR CNRS 7081, Faculté de Pharmacie, Université Louis Pasteur, 67401 Illkirch, France*

**TABLE 1.** Experimental  $^{31}\text{P}$  values of the principal tensor elements  $\delta_i$  and corresponding anisotropic parameters for L o-phosphoserine and AMP-5' at different pH

| Compound          | pH    | $\delta_{\text{iso}}$<br>(ppm) | $\delta_{11}$<br>(ppm) | $\delta_{22}$<br>(ppm) | $\delta_{33}$<br>(ppm) | $\delta$<br>(ppm) | $\Omega$<br>(ppm) | $\eta$ | $\kappa$ |
|-------------------|-------|--------------------------------|------------------------|------------------------|------------------------|-------------------|-------------------|--------|----------|
| L o-phosphoserine | 1.96  | 0.2                            | 65.4                   | 9.5                    | -74.3                  | -74.5             | 139.7             | 0.75   | 0.2      |
|                   | 5.61  | 2.9                            | 73.4                   | 13.0                   | -77.6                  | -80.5             | 151.0             | 0.75   | 0.2      |
|                   |       | 2.9                            | 70.3                   | -17.3                  | -44.3                  | 67.4              | 114.6             | 0.4    | -0.53    |
|                   | 11.96 | 8.4                            | 84.1                   | -14.3                  | -44.5                  | 75.7              | 128.6             | 0.4    | -0.53    |
| AMP-5'            | 3.92  | 1.6                            | 69.3                   | 11.2                   | -75.8                  | -77.4             | 152               | 0.75   | 0.19     |
|                   | 6.32  | 4.5                            | 68.8                   | 15.8                   | -71.1                  | -75.6             | 143               | 0.70   | 0.24     |
|                   | 8.48  | 7.4                            | 79.9                   | -12.5                  | -45.1                  | 72.5              | 125               | 0.45   | -0.48    |

\* estimated errors in  $\delta_{11}$ ,  $\delta_{22}$ ,  $\delta_{33}$  are  $\pm 1$  ppm; anisotropy is calculated as  $\delta = (\delta_{33} - \delta_{\text{iso}})$  and asymmetry as  $\eta = (\delta_{22} - \delta_{11}) / \delta$  when  $|\delta_{11} - \delta_{\text{iso}}| \leq |\delta_{33} - \delta_{\text{iso}}|$  or as  $\delta = (\delta_{11} - \delta_{\text{iso}})$  and  $\eta = (\delta_{22} - \delta_{33}) / \delta$  when  $|\delta_{11} - \delta_{\text{iso}}| \geq |\delta_{33} - \delta_{\text{iso}}|$ . Span is expressed as  $\Omega = \delta_{11} - \delta_{33}$ , skew as  $\kappa = 3(\delta_{22} - \delta_{\text{iso}}) / \Omega$
